# Supplementary material
Source: publisher site journal article supplement (https://www.dovepress.com/article/556886)
Supplement: Supplementary file 1 [file 556886%20Revised%20Supplementary%20material_3_1.docx]

List of supplementary figures and tables

| Supplementary Table | |
| --- | --- |
| Supplementary Table 1 | The 2017 McDonald criteria for diagnosis of MS in patients with an attack at onset |
| Supplementary Table 2 | Kurtzke’s Expanded Disability Status Score |

Supplementary Table 1 The 2017 McDonald criteria for diagnosis of MS in patients with an attack at onset

|  | Number of lesions with objective clinical evidence | Additional data needed for a diagnosis of MS |
| --- | --- | --- |
| **≥2 clinical attacks** | ≥2 | None** |
| **≥2** **clinical** **attacks** | 1 (as well as clear-cut historical evidence of a previous attack involving a lesion in a distinct anatomical location*) | None** |
| **≥2** **clinical** **attacks** | 1 | Dissemination in *space* demonstrated by an additional clinical attack implicating a different CNS site or by MRI |
| **1** **clinical** **attack** | ≥2 | Dissemination in *time* demonstrated by an additional clinical attack or by MRI, or demonstration of CSF-specific OCB*** |
| **1** **clinical** **attack** | 1 | Dissemination in *space* demonstrated by an additional clinical attack implicating a different CNS site or by MRI, and dissemination in *time* demonstrated by an additional clinical attack or by MRI, or demonstration of CSF-specific OCB*** |

If the 2017 McDonald Criteria are fulfilled and there is no better explanation for the clinical presentation, the diagnosis is MS. If MS is suspected by virtue of a CIS but the 2017 McDonald Criteria are not completely met, the diagnosis is possible MS. If another diagnosis arises during the evaluation that better explains the clinical presentation, the diagnosis is not MS.

*No additional tests required to demonstrate disseminated in time and space. However, brain MRI should be obtained in all patients suspected of having MS. Spinal cord MRI or CSF examination should be considered in patients with insufficient clinical and MRI evidence, a presentation other than a typical CIS, or with atypical features. If imaging or other (e.g. CSF) tests are negative, caution needs to be taken before diagnosing MS, and alternative diagnoses should be considered.

**Clinical diagnosis based on objective clinical findings for 2 attacks is most secure. Reasonable historical evidence for one past attack can include events characteristic for a previous inflammatory demyelinating attack, but at least one attack must be supported by objective findings.

***The presence of OCBs does not demonstrate dissemination in time but can substitute for the requirement for demonstration of this measure.

# Supplementary Table 2 Kurtzke’s Expanded Disability Status Score

| **0** | Normal neurologic examination |
| --- | --- |
| **1.0** | No disability, minimal signs in one functional system |
| **1.5** | No disability, minimal signs in more than one functional system |
| **2.0** | Minimal disability in one functional system |
| **2.5** | Minimal disability in two functional systems |
| **3.0** | Moderate disability in one functional system, or mild disability in three or four functional systems though fully ambulatory |
| **3.5** | Fully ambulatory but with moderate disability in three or four functional systems |
| **4.0** | Fully ambulatory without aid, self-sufficient, up and about some 12 hours a day despite relatively severe disability. Able to walk without aid or rest some 500 meters |
| **4.5** | Fully ambulatory without aid, up and about much of the day, able to work a full day, may otherwise have some limitation of full activity or require minimal assistance, characterized by relatively severe disability. Able to walk without aid or rest for some 300 meters |
| **5.0** | Ambulatory without aid or rest for about 200 meters; disability severe enough to preclude full daily activities (e.g. to work full day without special provisions) |
| **5.5** | Ambulatory without aid or rest for about 100 meters; disability severe enough to preclude full daily activities |
| **6.0** | Intermittent or unilateral constant assistance (cane, crutch, or brace) required to walk about 100 meters with or without resting |
| **6.5** | Constant bilateral assistance (canes, crutches, or braces) required to walk about 20 meters without resting |
| **7.0** | Unable to walk beyond about 5 meters even with aid. Essentially restricted to a wheelchair. Wheels self in standard wheelchair and transfers alone. Active in wheelchair about 12 hours a day |
| **7.5** | Unable to take more than a few steps. Restricted to wheelchair. May need aid to transfer. Wheels self but cannot carry on in standard wheelchair a full day. May require a motorized wheelchair |
| **8.0** | Unable to walk at all, essentially restricted to bed, chair or wheelchair but may be out of bed much of the day. Retains many self-care functions. Generally has effective use of the arms |
| **8.5** | Essentially restricted to bed much of the day. Has some effective use of arm(s). Retains some self-care functions |
| **9.0** | Helpless bed patient. Can communicate and eat |
| **9.5** | Totally helpless bed patient. Unable to communicate effectively or eat/ swallow |
| **10** | Death due to Multiple Sclerosis |
